# Supplementary material
Source: PubMed Central journal article supplement (PMC1289394)

**Figure S1**

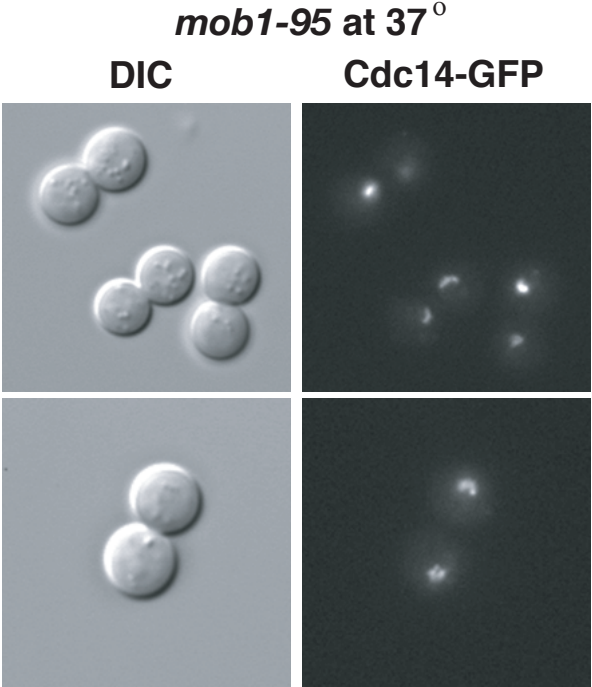

**Figure S2**

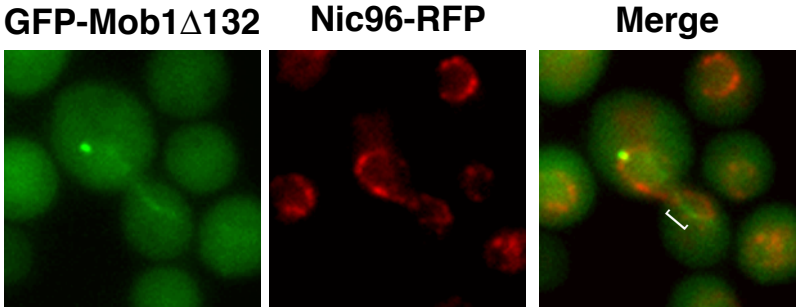

**Figure S3**

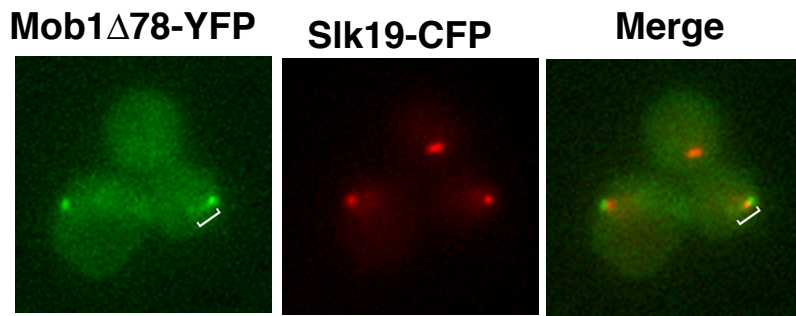

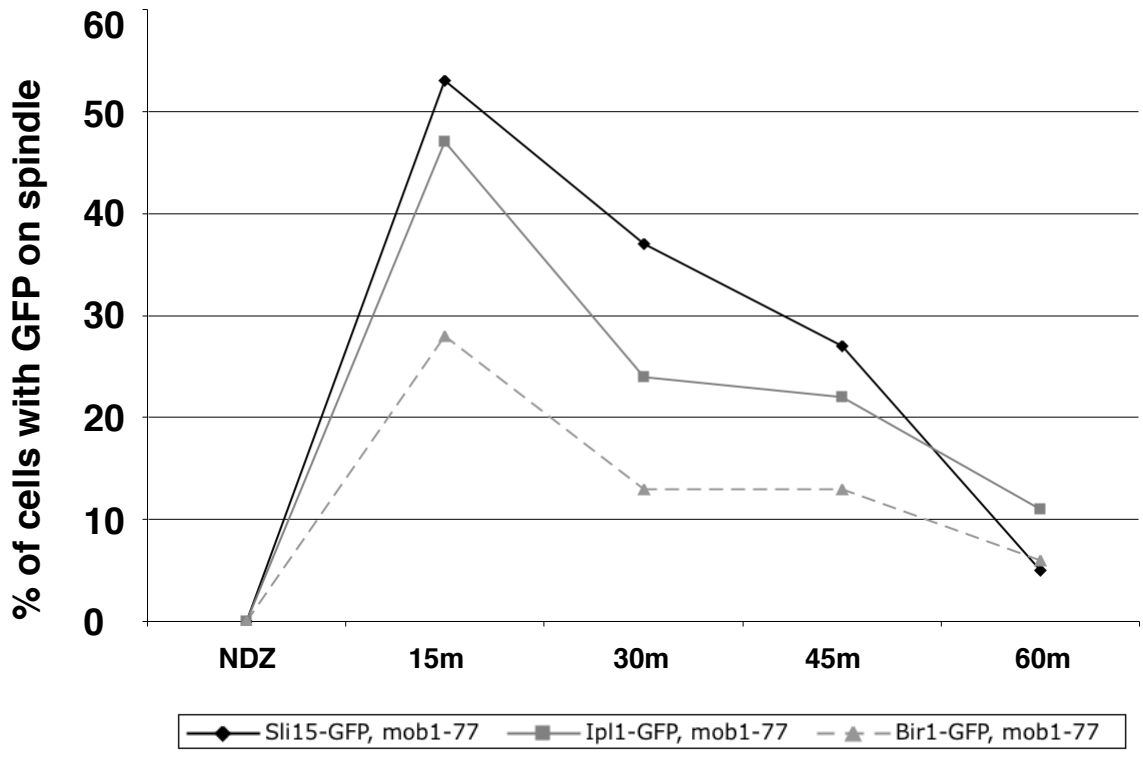

Figure S5

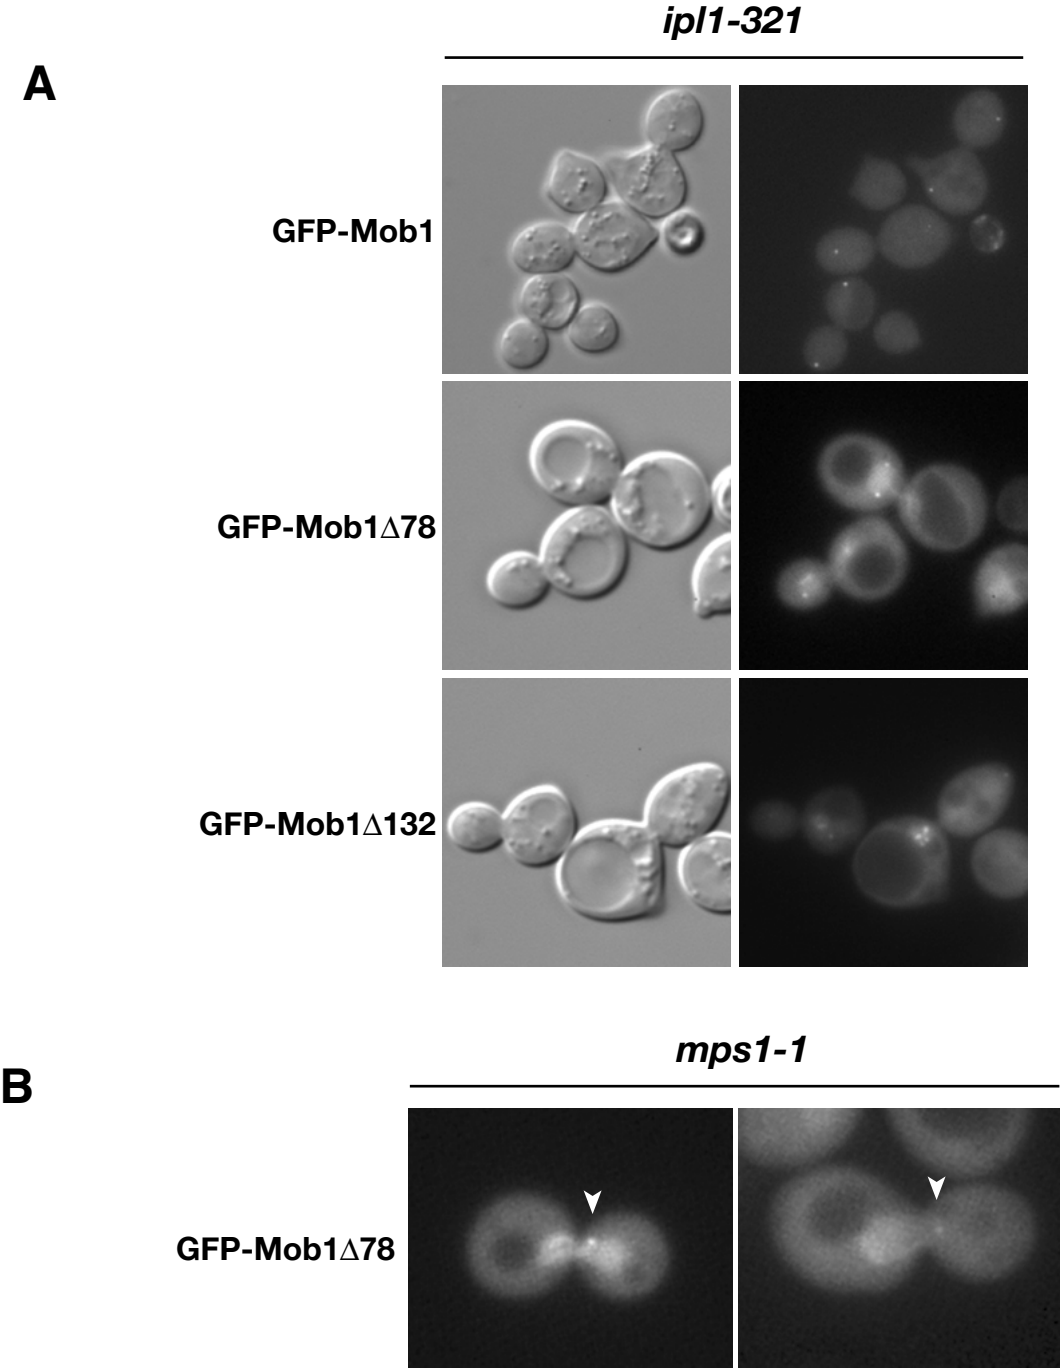

Supplement: mbc_E05-04-0337_1.pdf [file mbc_E05-04-0337_1.pdf]
